# Supplementary material for: Variation of 13C and 15N enrichments in different plant components of labeled winter wheat (Triticum aestivum L.)
Source: PeerJ. 2019 Oct 2;7:e7738. doi: 10.7717/peerj.7738 (PMC6778429; doi:10.7717/peerj.7738)
Supplement: Dataset S1 — Each data point indicates biomass, C content, and N content of different wheat components, respectively [file peerj-07-7738-s001.xls]

## Sheet: Sheet1
	Fig.2a
	Biomass (g pot-1)			Root	Straw	Ear	Total plant
	Elongation	-N	Repeat 1	3.2395	19.701	7.403	30.3435
			Repeat 2	3.5145	18.3865	7.436	29.337
			Repeat 3	3.7675	17.7265	7.4525	28.9465
			Repeat 4	4.18	19.745	7.1	31.025
		+N	Repeat 1	4.4935	25.949	14.2835	44.726
			Repeat 2	3.663	25.4485	11.8635	40.975
			Repeat 3	4.466	24.178	10.461	39.105
			Repeat 4	3.597	21.923	11.8415	37.3615
	Grain filling	-N	Repeat 1	6.42	22.19	28.99	57.6
			Repeat 2	4.02	18.72	24.85	47.59
			Repeat 3	5.54	17.5	22.94	45.98
			Repeat 4	3.82	22.58	29.01	55.41
		+N	Repeat 1	4.69	29.42	39.85	73.96
			Repeat 2	2.67	25.59	39.69	67.95
			Repeat 3	6.29	27.45	44.58	78.32
			Repeat 4	4.03	27.78	41.06	72.87
	Fig.2b
	C content (g C kg-1)			Root	Straw	Ear
	Elongation	-N	Repeat 1	397.606	439.843	440.826
			Repeat 2	364.131	436.528	440.087
			Repeat 3	419.92	437.616	438.299
			Repeat 4	389.475	437.931	439.876
		+N	Repeat 1	405.653	429.648	428.056
			Repeat 2	383.093	418.19	418.056
			Repeat 3	359.055	433.367	433.571
			Repeat 4	392.038	433.713	423.416
	Grain filling	-N	Repeat 1	435.362	451.056	435.455
			Repeat 2	421.237	447.33	432.81
			Repeat 3	410.56	447.039	437.223
			Repeat 4	435.36	441.909	436.561
		+N	Repeat 1	423.191	440.711	430.357
			Repeat 2	418.07	441.804	431.896
			Repeat 3	425.92	439.927	428.391
			Repeat 4	424.29	438.653	428.576
	Fig.2c
	N content (g N kg-1)			Root	Straw	Ear
	Elongation	-N	Repeat 1	9.09407	6.92918	15.8556
			Repeat 2	7.61468	6.01403	16.9192
			Repeat 3	7.03612	6.41389	15.596
			Repeat 4	8.14754	7.35676	15.4544
		+N	Repeat 1	10.7857	9.0835	17.4684
			Repeat 2	8.46953	9.71317	18.7247
			Repeat 3	9.95145	9.85223	17.3069
			Repeat 4	9.21587	9.65177	17.4301
	Grain filling	-N	Repeat 1	10.0901	3.48297	14.8205
			Repeat 2	10.7571	4.53788	13.717
			Repeat 3	7.86116	4.1021	13.8334
			Repeat 4	9.73873	3.38401	16.1889
		+N	Repeat 1	10.5022	6.15429	24.2119
			Repeat 2	12.5782	6.0732	23.1786
			Repeat 3	8.76429	7.37939	23.155
			Repeat 4	6.77374	7.68404	24.7893
