# Supplementary material for: Variation of 13C and 15N enrichments in different plant components of labeled winter wheat (Triticum aestivum L.)
Source: PeerJ. 2019 Oct 2;7:e7738. doi: 10.7717/peerj.7738 (PMC6778429; doi:10.7717/peerj.7738)
Supplement: Dataset S2 — Each data point indicates the δ13C (‰) values of different labeled wheat components [file peerj-07-7738-s002.xlsx]

## Sheet: Sheet1
	Fig 1（raw date）	δ13C（‰）	Shoot 1	Shoot 2	Shoot 3	Shoot 4	Shoot 5	Shoot 6	Shoot 7	Shoot 8	Shoot 9
Elongation	-N	Ear	130.176	141.96	188.958	91.2627	115.984	95.1189	42.1777	57.3964	97.3162
		Upper leaves	750.321	998.17	767.737	568.821	367.66	1153.98	544.956	450.421	474.192
		Upper stem	72.2946	83.7655	69.5756	112.18	135.657	122.13	81.1966	73.1254	68.3693
		Middle leaves	362.417	931.521	800.482	1109.85	1125.86	628.69	785.162	1186.71	1096.43
		Middle stem	85.8705	165.454	44.3288	184.473	195.777	229.763	78.3031	43.8408	136.359
		Lower leaves	183.514	37.9533	113.2	111.748	384.18	47.3652	230.584	632.33	218.509
		Lower stem	406.433	541.915	462.643	254.236	251.336	547.829	715.336	500.765	463.914
	+N	Ear	47.8575	64.5475	70.7478	238.031	116.132	129.05	97.2436	98.358	102.406
		Upper leaves	697.124	254.668	498.65	724.377	1056.3	891.996	365.781	692.462	580.617
		Upper stem	53.8919	58.4474	97.0376	112.73	156.489	229.051	86.7927	86.8026	39.0998
		Middle leaves	504.8	631.403	323.738	306.907	225.148	315.855	510.181	63.9089	739.938
		Middle stem	105.537	145.831	76.1155	291.822	109.208	164.935	74.8933	90.2864	180.124
		Lower leaves	35.0168	110.936	46.8443	110.966	67.9755	66.5925	70.5971	84.0662	158.201
		Lower stem	296.372	310.113	370.348	266.221	425.457	582.411	415.058	437.805	106.009
Grain filling	-N	Ear	219.462	238.615	225.222	243.524	194.238	294.347	306.227	247.068	273.19
		Upper leaves	212.48	187.722	126.862	228.003	155.783	96.1779	159.026	134.234	130.914
		Upper stem	55.7953	61.2148	56.0127	63.4129	56.0626	57.7449	85.5329	66.1256	54.2892
		Middle leaves	70.6385	85.7436	91.0373	94.8971	80.8816	94.5578	96.386	131.96	101.778
		Middle stem	52.5783	50.4162	68.5081	65.0463	65.828	52.2273	54.1646	60.1167	77.1839
		Lower leaves	60.7101	70.9308	63.1632	72.5939	67.1499	61.3437	55.732	61.0492	61.5515
		Lower stem	66.9786	61.102	67.2236	64.1617	73.224	72.2153	55.5168	59.9313	63.0401
	+N	Ear	312.839	296.792	254.929	277.093	232.124	313.181	254.99	286.309	339.13
		Upper leaves	190.988	182.668	241.181	203.493	155.523	151.187	145.422	205.312	170.166
		Upper stem	88.8753	77.4447	92.5233	66.0242	93.6227	72.8347	75.1004	131.234	84.9162
		Middle leaves	87.9106	108.07	90.1457	113.819	49.924	122.385	45.1162	48.8037	64.81
		Middle stem	75.8897	63.4735	51.3558	80.3638	64.3246	154.37	34.3296	59.2908	55.4557
		Lower leaves	45.8728	54.6614	59.4037	58.0949	41.959	51.6951	38.9503	43.0268	29.651
		Lower stem	74.0758	37.1937	55.5481	51.2445	56.3082	47.3738	43.5461	28.2198	35.088
