# Supplementary material for: Variation of 13C and 15N enrichments in different plant components of labeled winter wheat (Triticum aestivum L.)
Source: PeerJ. 2019 Oct 2;7:e7738. doi: 10.7717/peerj.7738 (PMC6778429; doi:10.7717/peerj.7738)
Supplement: Dataset S3 — Each data point indicates the 15N values (‰) of wheat plant materials [file peerj-07-7738-s003.xlsx]

## Sheet: Sheet1
	Fig 2（raw date）
	Control samples	δ15N（‰）
		Shoot 1	Shoot 2	Shoot 3	Shoot 4	Shoot 5	Shoot 6	Shoot 7	Shoot 8	Shoot 9
Elongation	Ear	21.3047	13.3528	12.4003	5.85511	7.04443	16.8657	5.42201	1.57174	6.22591
	Upper leaves	16.1664	9.71641	9.77424	9.0285	8.8971	7.19054	8.05528	4.42139	4.19954
	Upper stem	20.0259	20.9143	8.15623	12.1655	10.0448	16.336	8.42771	8.60904	2.94163
	Middle leaves	30.3649	31.6321	21.5299	9.14045	14.9109	8.9804	14.0698	9.40759	11.1389
	Middle stem	66.5736	32.8766	65.6879	22.7497	16.2813	15.5384	21.4678	14.9312	15.0921
	Lower leaves	63.775	51.0788	50.0294	44.3332	36.7407	29.0667	27.8088	29.0342	13.1505
	Lower stem	59.3365	61.5605	49.4898	44.664	51.1947	88.6854	38.13	34.0923	53.5647
Grain filling	Ear	7.56597	11.5757	11.9755	18.1513	13.5656	27.6806	29.0347	17.4688	16.3205
	Upper leaves	20.8412	19.5234	23.121	13.5482	14.4615	21.5626	24.9816	16.1472	12.9314
	Upper stem	23.5243	25.6891	15.0726	16.5138	10.598	17.3251	18.5316	30.9202	32.8059
	Middle leaves	26.7019	32.4248	29.7736	23.6747	38.0715	40.6021	25.0389	23.5218	28.7718
	Middle stem	85.6713	42.2618	47.4779	47.5392	25.6875	47.5477	41.9091	27.5182	18.116
	Lower leaves	66.5467	45.3082	36.8664	39.8347	65.5812	59.9581	78.4221	41.3572	37.223
	Lower stem	84.0782	70.5048	32.5503	9.42409	52.3133	26.5969	25.7661	17.1293	32.0522
	Labeled samples	δ15N（‰）
		Shoot 1	Shoot 2	Shoot 3	Shoot 4	Shoot 5	Shoot 6	Shoot 7	Shoot 8	Shoot 9
Elongation	Ear	12289.8	11608.8	10706.4	13347.2	8833.59	13119.7	8381.41	9013.57	11494.5
	Upper leaves	13347.4	12040.4	9335.3	9888.07	7318.3	9294.33	12252	11762.1	9967.31
	Upper stem	13176.5	11921.1	9909.81	10265.8	7502.08	9829.44	10303.8	11892.7	12906.4
	Middle leaves	11285.1	10236.5	12790.7	7420.75	7681.72	9008.79	11521.7	10632.3	9153.22
	Middle stem	11185.7	10620.2	11976.8	9207.59	7623.43	8011.57	9973.9	11512.9	9618.38
	Lower leaves	13294.3	11587.3	13272.7	10590.7	11084.5	7358.94	11567.9	9656.92	12869.8
	Lower stem	12187.7	10154.5	12247.6	9011.97	9359.65	6237.45	8285.72	12038.2	9781.93
Grain filling	Ear	14941.3	13118.6	17964.9	13974.9	12326.2	18856.6	16949.6	13454.5	18514.5
	Upper leaves	17221.3	15838.8	16006.7	15961	15378.4	16742	16886.9	16170.5	12803.5
	Upper stem	17071.5	15014.7	15056.1	13532.5	13952.1	15965.7	15665.6	14806.4	11877.4
	Middle leaves	15308.2	12752.3	15961.4	15223.2	14556.4	12672	11066.5	12441.6	16133
	Middle stem	16495	12484.1	16072.9	15262.8	15988.7	14269.5	13116.2	12708.8	16977.4
	Lower leaves	12018	10932	12267.6	11308.2	10709.4	13147.7	13508.8	11147.7	13788.2
	Lower stem	14405.2	10531	14182.6	12728.3	14506.5	13196.2	14972.5	13560.9	12387.2
